# Supplementary material for: The Association of Malnutrition and Health-Related Factors among 474,467 Older Community-Dwellers: A Population-Based Data Mining Study in Guangzhou, China
Source: MDPI journal article supplement (doi:10.3390/nu16091338), 2024-04-29
Supplement: s1 [file s1]

## Supplement

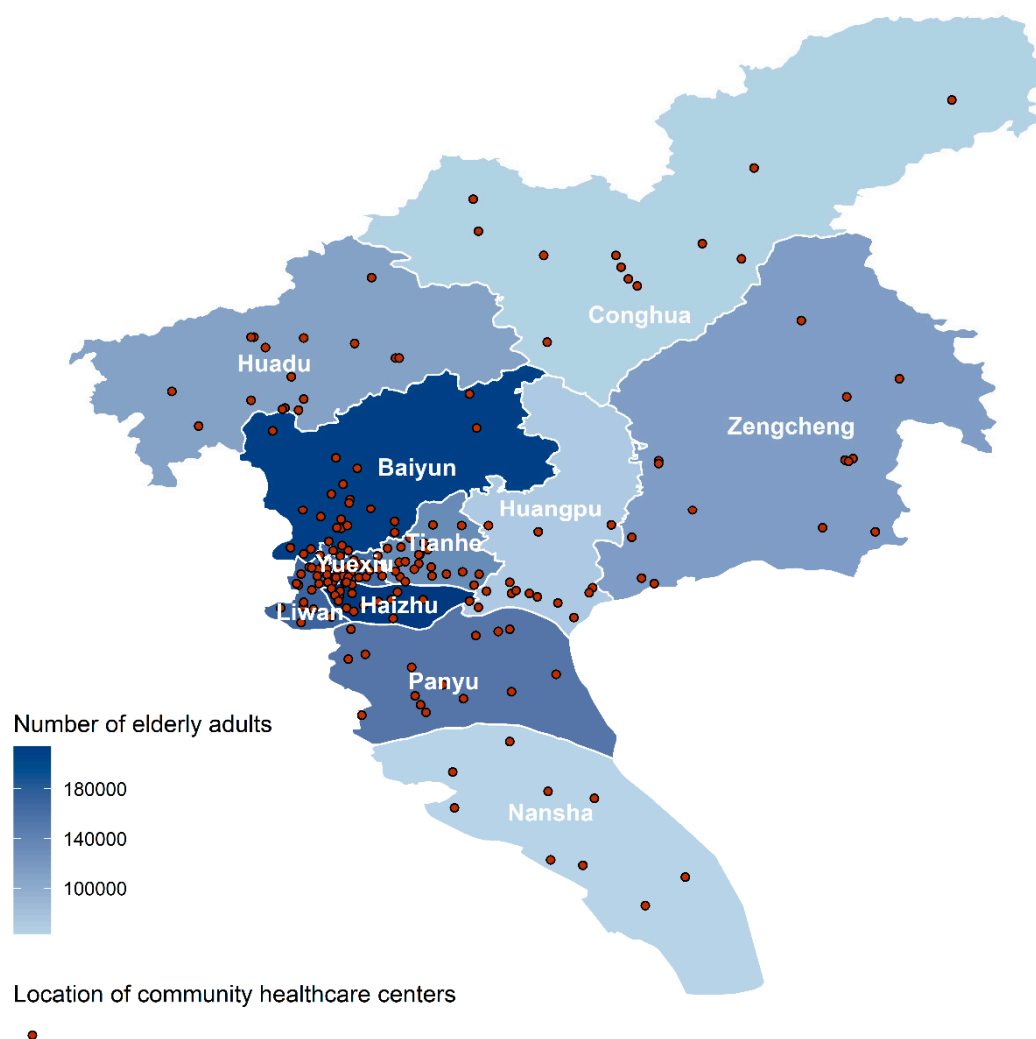

**Figure S1.** Distribution of the number of elderly adults by districts and location of community health centers in Guangzhou, China.

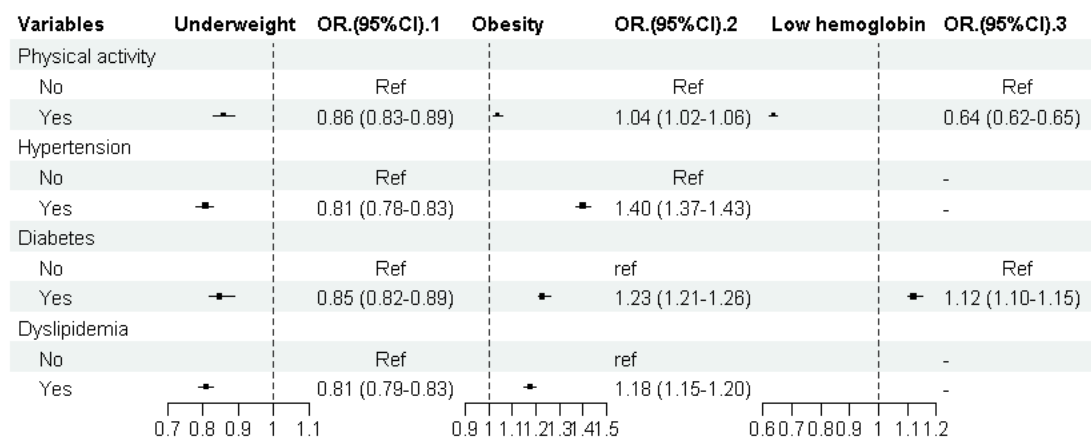

**Figure S2.** Association factors with three patterns of malnutrition explored by multivariate logistic regression with “dietary habits” removed\*.

\*: The model was adjusted for all socio-demographic characteristics including age, gender, census register, living areas, education level, marital status, and medical insurance.

OR-odd ratio, CI-confidence interval.

**Table S1.** Comparison of the study population and the seventh national population census of Guangzhou in 2020.

| <b>Variables</b> | <b>Study population, %<br/>(n =474,467)</b> | <b>Seventh national population<br/>census, %<br/>(n =1,460,333)<sup>a</sup></b> |
|------------------|---------------------------------------------|---------------------------------------------------------------------------------|
| <b>Age</b>       |                                             |                                                                                 |
| 65-69            | 40.33                                       | 39.44                                                                           |
| 70-74            | 28.49                                       | 24.58                                                                           |
| 75-79            | 15.51                                       | 14.74                                                                           |
| 80-84            | 9.42                                        | 11.30                                                                           |
| ≥85              | 6.25                                        | 9.94                                                                            |
| <b>Gender</b>    |                                             |                                                                                 |
| Male             | 41.21                                       | 46.16                                                                           |
| Female           | 58.79                                       | 53.84                                                                           |

a: The categories are grouped according to the Seventh National Population Census of Guangzhou: National Bureau of Statistics of China, 2020.

**Table S2.** Results of stepwise analysis for underweight, overweight, and low hemoglobin\*

| Characteristics                           | Underweight<br>OR (95%CI) | Overweight<br>OR (95%CI) | Low<br>hemoglobin<br>OR (95%CI) |
|-------------------------------------------|---------------------------|--------------------------|---------------------------------|
| <b>Age</b> (ref:65-69)                    |                           |                          |                                 |
| 70-74                                     | 0.99 (0.96-1.03)          | 0.97 (0.95-1.00)         | 1.03 (1.00-1.06)                |
| 75-79                                     | 1.07 (1.03-1.12)          | 0.96 (0.93-0.99)         | 1.08 (1.04-1.11)                |
| 80-84                                     | 1.04 (0.99-1.09)          | 0.91 (0.88-0.94)         | 1.19 (1.15-1.24)                |
| ≥85                                       | 1.17 (1.10-1.24)          | 0.84 (0.80-0.87)         | 1.41 (1.35-1.47)                |
| <b>Gender</b> (ref: Male)                 |                           |                          |                                 |
| Female                                    | 1.02 (0.99-1.05)          | 1.08 (1.06-1.10)         | 0.41 (0.40-0.41)                |
| <b>Census register</b> (ref: Guangzhou)   |                           |                          |                                 |
| Non-Guangzhou                             | 0.86 (0.81-0.91)          | 1.01 (0.98-1.05)         | 0.87 (0.84-0.91)                |
| <b>Living area</b> (ref: Urban)           |                           |                          |                                 |
| Rural                                     | 1.10 (1.07-1.14)          | 1.08 (1.06-1.11)         | 1.18 (1.15-1.21)                |
| <b>Education</b> (ref: No school)         |                           |                          |                                 |
| Primary                                   | 0.87 (0.83-0.91)          | 1.08 (1.04-1.12)         | 0.79 (0.76-0.81)                |
| Secondary                                 | 0.78 (0.74-0.82)          | 0.90 (0.87-0.94)         | 0.55 (0.53-0.58)                |
| College                                   | 0.82 (0.77-0.86)          | 1.11 (1.07-1.15)         | 0.84 (0.81-0.87)                |
| <b>Marital status</b> (ref: Single)       |                           |                          |                                 |
| Married                                   | 0.81 (0.78-0.85)          | 1.05 (1.02-1.09)         | 0.56 (0.55-0.58)                |
| <b>Medical insurance</b> (ref: Uninsured) |                           |                          |                                 |
| Insured                                   | 1.21 (1.10-1.31)          | 1.06 (1.01-1.12)         | 1.24 (1.17-1.33)                |
| <b>Current smoking</b> (ref: No)          |                           |                          |                                 |
| Yes                                       | 1.44 (1.39-1.51)          | 0.55 (0.53-0.57)         | 0.58 (0.55-0.60)                |
| <b>Alcohol consumption</b> (ref: No)      |                           |                          |                                 |
| Yes                                       | 0.79 (0.75-0.84)          | 1.21 (1.17-1.26)         | 0.55 (0.53-0.58)                |
| <b>Physical activity</b> (ref: No)        |                           |                          |                                 |
| Yes                                       | 0.87 (0.84-0.90)          | 1.03 (1.01-1.05)         | 0.66 (0.64-0.67)                |
| <b>Dietary habits</b> (ref: Balanced)     |                           |                          |                                 |
| Meat or fish diet                         | 0.91 (0.73-1.13)          | 1.94 (1.74-2.17)         | 0.78 (0.66-0.92)                |
| Vegetarian diet                           | 1.01 (0.91-1.13)          | 1.00 (0.93-1.07)         | 0.91 (0.84-0.99)                |
| <b>Hypertension</b> (ref: No)             |                           |                          |                                 |
| Yes                                       | 0.81 (0.79-0.83)          | 1.39 (1.36-1.42)         | 0.96 (0.94-0.99)                |
| <b>Diabetes</b> (ref: No)                 |                           |                          |                                 |
| Yes                                       | 0.85 (0.82-0.89)          | 1.23 (1.21-1.26)         | 1.13 (1.10-1.16)                |
| <b>Dyslipidemia</b> (ref: No)             |                           |                          |                                 |
| Yes                                       | 0.81 (0.79-0.84)          | 1.17 (1.15-1.20)         | 0.84 (0.82-0.86)                |

\*: This Table also shows the OR and 95% CI for socio-demographic characteristics while Figure 2 in the manuscript does not because we concentrate on health-related factors in this study.
